# Supplementary material
Source: Springer Nature journal article supplement (https://www.springermedizin.de/resource/supplementary/13024_2011_334_MOESM1_ESM.pdf/9643776)

**Additional file 1**

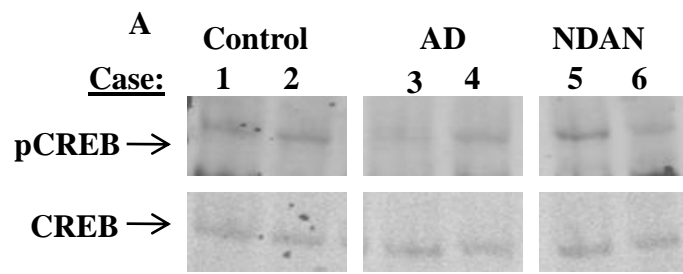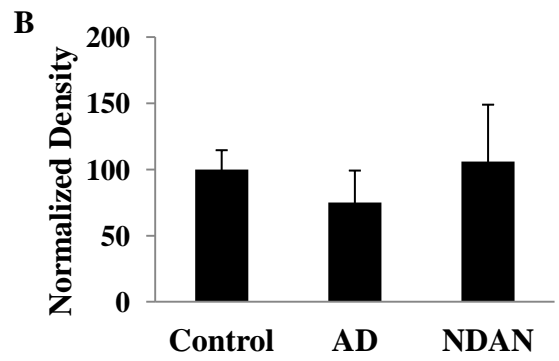

Supplement: MOESM1 [file 9643776]
